# Supplementary material for: Host Plants Shape the Codon Usage Pattern of Turnip Mosaic Virus
Source: MDPI journal article supplement (doi:10.3390/v14102267), 2022-10-15
Supplement: s1 [file s1]

Table S1. The turnip mosaic virus isolates used in this study.

| Accession number | Isolate   | Host                       | Country    | Years | Reference             |
|------------------|-----------|----------------------------|------------|-------|-----------------------|
| KY111274         | DJ1       | <i>Raphanus sativus</i>    | SouthKorea | 2015  | Gong et al., 2016     |
| KY111273         | DJ2       | <i>R.sativus</i>           | SouthKorea | 2015  | Gong et al., 2016     |
| KY111272         | DJ3       | <i>R.sativus</i>           | SouthKorea | 2015  | Gong et al., 2016     |
| KY111271         | DJ4       | <i>R.sativus</i>           | SouthKorea | 2015  | Gong et al., 2016     |
| KY111270         | DJ5       | <i>R.sativus</i>           | SouthKorea | 2015  | Gong et al., 2016     |
| KY111269         | DJ6       | <i>R.sativus</i>           | SouthKorea | 2015  | Gong et al., 2016     |
| KY111268         | SW1       | <i>R.sativus</i>           | SouthKorea | 2015  | Gong et al., 2016     |
| KX674733         | GJS4      | <i>R.sativus</i>           | SouthKorea | 2015  | Gong et al., 2016     |
| KX674732         | GJS3      | <i>R.sativus</i>           | SouthKorea | 2015  | Gong et al., 2016     |
| KX674731         | GJS2      | <i>R.sativus</i>           | SouthKorea | 2015  | Gong et al., 2016     |
| KX674730         | KIH2      | <i>R.sativus</i>           | SouthKorea | 2015  | Gong et al., 2016     |
| KX674729         | KIH1      | <i>R.sativus</i>           | SouthKorea | 2015  | Gong et al., 2016     |
| KX579484         | Jj16      | <i>R.sativus</i>           | SouthKorea | 2014  | Chung et al., 2016    |
| DQ648591         | CAR37A    | <i>R.sativus</i>           | Poland     | 2006  | Kozubek et al., 2006  |
| KU140422         | R065      | <i>R.sativus</i>           | SouthKorea | 2014  | Chung et al., 2015    |
| KU140421         | R041      | <i>R.sativus</i>           | SouthKorea | 2014  | Chung et al., 2015    |
| KR153040         | WFLB14    | <i>R.sativus</i>           | China      | 2014  | Chung et al., 2015    |
| KR153039         | LWLB      | <i>R.sativus</i>           | China      | 2014  | Chung et al., 2015    |
| KR153038         | CCLB      | <i>B.oleracea</i>          | China      | 2014  | Chung et al., 2015    |
| HQ637383         | CAR51     | <i>R.sativus</i>           | Poland     | 2004  | Chung et al., 2015    |
| AB252117         | GRC42     | <i>R.sativus</i>           | Greece     | 1999  | Ohshima et al., 2007  |
| AB093611         | BZ1       | <i>R.sativus</i>           | Brazil     | 1996  | Tomimura et al., 2003 |
| AB093606         | RUS1      | <i>R.sativus</i>           | Russia     | 1993  | Tomimura et al., 2003 |
| AB093598         | Al        | <i>B.oleracea</i>          | Italy      | 1968  | Tomimura et al., 2003 |
| AP017884         | TUR77     | <i>B.oleracea</i>          | Turkey     | 2007  | Yasaka et al., 2017   |
| AP017854         | IRNWRSh40 | <i>B.oleracea</i>          | Iran       | 2007  | Yasaka et al., 2017   |
| AP017846         | IRNSRSh35 | <i>B.rapa</i>              | Iran       | 2007  | Yasaka et al., 2017   |
| AP017845         | IRNRRSh35 | <i>Sisymbrium loeselii</i> | Iran       | 2007  | Yasaka et al., 2017   |
| AP017840         | GRC39     | <i>S.loeselii</i>          | Greece     | 1996  | Yasaka et al., 2017   |
| AP017839         | GRC38     | <i>S.loeselii</i>          | Greece     | 1996  | Yasaka et al., 2017   |
| AP017819         | GRC5      | <i>S.loeselii</i>          | Greece     | 1993  | Yasaka et al., 2017   |
| AP017814         | TUR79     | <i>S.loeselii</i>          | Turkey     | 2007  | Yasaka et al., 2017   |
| AP017808         | IRNTuSh18 | <i>S.loeselii</i>          | Iran       | 2007  | Yasaka et al., 2017   |
| AP017801         | IRNTOFS6  | <i>Rapistrum rugosum</i>   | Iran       | 2006  | Yasaka et al., 2017   |
| AP017800         | IRNTOFS3  | <i>R.rugosum</i>           | Iran       | 2006  | Yasaka et al., 2017   |
| AP017799         | IRNTOFS2  | <i>R.rugosum</i>           | Iran       | 2006  | Yasaka et al., 2017   |
| AP017797         | IRNTKE    | <i>R.rugosum</i>           | Iran       | 2006  | Yasaka et al., 2017   |
| AP017796         | IRNTlm1   | <i>B.rapa</i>              | Iran       | 2004  | Yasaka et al., 2017   |
| AP017790         | IRNS4     | <i>S.loeselii</i>          | Iran       | 2003  | Yasaka et al., 2017   |
| AP017789         | IRNS3     | <i>S.loeselii</i>          | Iran       | 2003  | Yasaka et al., 2017   |
| AP017788         | IRNS1     | <i>B.oleracea</i>          | Iran       | 2003  | Yasaka et al., 2017   |
| AP017785         | IRNRN6    | Orchis                     | Iran       | 2005  | Yasaka et al., 2017   |
| AP017784         | IRNRkaraj | Orchis                     | Iran       | 2004  | Yasaka et al., 2017   |
| AP017783         | IRNRK     | Orchis                     | Iran       | 2004  | Yasaka et al., 2017   |
| AP017780         | IRNRaNi3  | Orchis                     | Iran       | 2005  | Yasaka et al., 2017   |
| AP017779         | IRNRaFCh  | <i>B.rapa</i>              | Iran       | 2006  | Yasaka et al., 2017   |
| AP017778         | IRNMY57   | <i>R.rugosum</i>           | Iran       | 2004  | Yasaka et al., 2017   |
| AP017769         | IRNKBS65  | <i>R.rugosum</i>           | Iran       | 2006  | Yasaka et al., 2017   |
| AP017768         | IRNKBS58  | <i>B.oleracea</i>          | Iran       | 2006  | Yasaka et al., 2017   |
| AP017756         | GRC43     | <i>S.loeselii</i>          | Greece     | 1999  | Yasaka et al., 2017   |

|          |          |                        |                    |      |                        |
|----------|----------|------------------------|--------------------|------|------------------------|
| AP017754 | IRNEAM1  | <i>B.rapa</i>          | Iran               | 2005 | Yasaka et al., 2017    |
| AB701717 | GBR83    | <i>R.sativus</i>       | UK                 | 2002 | Nguyen et al., 2013    |
| AB701698 | BEL1     | <i>R.sativus</i>       | Belgium            | 1986 | Nguyen et al., 2013    |
| AB701697 | ASP      | <i>B.rapa</i>          | Germany            | 1995 | Nguyen et al., 2013    |
| AB701693 | OS       | <i>R.sativus</i>       | Germany            | 1981 | Nguyen et al., 2013    |
| AB701692 | ORM      | <i>R.sativus</i>       | Germany            | 1983 | Nguyen et al., 2013    |
| AB701690 | OM-N     | <i>R.sativus</i>       | Germany            | 1981 | Nguyen et al., 2013    |
| AB701691 | OM-A     | <i>R.sativus</i>       | Germany            | 1981 | Nguyen et al., 2013    |
| AP017815 | TUR242   | <i>R.sativus</i>       | Turkey             | 2012 | Yasaka et al., 2017    |
| AP017804 | IRNTRT9  | <i>B.rapa</i>          | Tehran             | 2006 | Yasaka et al., 2017    |
| AB440238 | IRNTRa6  | <i>B.rapa</i>          | Tehran             | 2004 | Farzadfar et al., 2009 |
| AP017803 | IRNTRa9  | <i>B.oleracea</i>      | Tehran             | 2004 | Yasaka et al., 2017    |
| AP017770 | IRN KhCa | <i>B.oleracea</i>      | Tehran             | 2005 | Yasaka et al., 2017    |
| AP017763 | IRNDM    | <i>B.oleracea</i>      | Iran               | 2004 | Yasaka et al., 2017    |
| AP017794 | IRNST    | <i>R.sativus</i>       | Tehran             | 2005 | Yasaka et al., 2017    |
| AP017773 | IRNMB6   | <i>B.rapa</i>          | Iran               | 2003 | Yasaka et al., 2017    |
| AP017795 | IRNTH    | <i>Brassica juncea</i> | Tehran             | 2006 | Yasaka et al., 2017    |
| AP017873 | TUR52    | <i>B.juncea</i>        | Turkey             | 2006 | Yasaka et al., 2017    |
| AB362513 | TUR9     | <i>B.juncea</i>        | Turkey             | 2005 | Korkmaz et al., 2008   |
| AP017864 | TUR10    | <i>R.sativus</i>       | Turkey             | 2006 | Yasaka et al., 2017    |
| LC537519 | CHSE1AB  | <i>B.juncea</i>        | China              | 1999 | Kawakubo et al., 2021  |
| LC537528 | CHZJ23   | <i>B.juncea</i>        | China              | 1999 | Kawakubo et al., 2021  |
| LC537525 | CHZH36   | <i>B.juncea</i>        | China              | 2000 | Kawakubo et al., 2021  |
| AB701725 | ITA8     | <i>B.juncea</i>        | Italy              | 1993 | Nguyen et al., 2013    |
| AB093600 | ITA7     | <i>B.oleracea</i>      | Italy              | 1990 | Tomimura et al., 2003  |
| KY111267 | SW2      | <i>B.oleracea</i>      | Not known          | 2015 | Kawakubo et al., 2021  |
| LC537507 | CHN305   | <i>B.oleracea</i>      | China              | 2014 | Kawakubo et al., 2021  |
| KX579485 | Jj13     | <i>B.oleracea</i>      | Not known          | 2014 | Kawakubo et al., 2021  |
| LC537496 | CHN172   | <i>B.oleracea</i>      | China              | 2011 | Kawakubo et al., 2021  |
| AB701703 | DNK3     | <i>B.oleracea</i>      | Not known          | 1978 | Nguyen et al., 2013    |
| AB252107 | CZE5     | <i>B.oleracea</i>      | South Bohemia      | 1993 | Ohshima et al., 2007   |
| AP017867 | TUR20    | <i>B.oleracea</i>      | Turkey             | 2006 | Yasaka et al., 2017    |
| LC537585 | UKR28    | <i>B.oleracea</i>      | Ukraine            | 2014 | Kawakubo et al., 2021  |
| LC537591 | UKR47    | <i>B.oleracea</i>      | Ukraine            | 2014 | Kawakubo et al., 2021  |
| LC537592 | UKR49    | <i>B.oleracea</i>      | Ukraine            | 2014 | Kawakubo et al., 2021  |
| LC537590 | UKR46    | <i>B.oleracea</i>      | Ukraine            | 2014 | Kawakubo et al., 2021  |
| LC537563 | MYA1     | <i>B.oleracea</i>      | Myanmar            | 2013 | Kawakubo et al., 2021  |
| LC537521 | CHYK56A  | <i>B.oleracea</i>      | China              | 2000 | Kawakubo et al., 2021  |
| LC537520 | CHYK20A  | <i>B.oleracea</i>      | China              | 2000 | Kawakubo et al., 2021  |
| LC537500 | CHN229   | <i>B.oleracea</i>      | China              | 2012 | Kawakubo et al., 2021  |
| LC537501 | CHN241   | <i>B.oleracea</i>      | China              | 2012 | Kawakubo et al., 2021  |
| LC537503 | CHN244   | <i>B.oleracea</i>      | China              | 2012 | Kawakubo et al., 2021  |
| LC537527 | CHZH34A  | <i>B.oleracea</i>      | China              | 2000 | Kawakubo et al., 2021  |
| LC537526 | CHZH33A  | <i>B.oleracea</i>      | China              | 2000 | Kawakubo et al., 2021  |
| AB747293 | VIET80   | <i>B.oleracea</i>      | Vietnam            | 2007 | Nguyen et al., 2013    |
| AB747306 | VIET170  | <i>B.juncea</i>        | Vietnam            | 2007 | Nguyen et al., 2013    |
| AB747312 | VIET177  | <i>B.juncea</i>        | Vietnam            | 2008 | Nguyen et al., 2013    |
| AB747299 | VIET158  | <i>B.juncea</i>        | Vietnam            | 2007 | Nguyen et al., 2013    |
| AB747307 | VIET172  | <i>B.juncea</i>        | Vietnam            | 2007 | Nguyen et al., 2013    |
| LC537541 | CZE11    | <i>B.rapa</i>          | The Czech Republic | 1994 | Kawakubo et al., 2021  |
| LC537542 | CZE12    | <i>B.juncea</i>        | The Czech Republic | 1994 | Kawakubo et al., 2021  |
| LC537545 | CZE15    | <i>R.sativus</i>       | The Czech Republic | 1994 | Kawakubo et al., 2021  |
| LC537543 | CZE13    | <i>R.sativus</i>       | The Czech Republic | 1994 | Kawakubo et al., 2021  |
| LC537547 | CZE17    | <i>R.sativus</i>       | The Czech Republic | 1994 | Kawakubo et al., 2021  |
| LC537544 | CZE14    | <i>R.sativus</i>       | The Czech Republic | 1994 | Kawakubo et al., 2021  |
| LC537546 | CZE16    | <i>R.sativus</i>       | The Czech Republic | 1994 | Kawakubo et al., 2021  |
| LC537537 | CZE2     | <i>R.sativus</i>       | The Czech Republic | 1993 | Kawakubo et al., 2021  |
| AP017837 | GRC34    | <i>B.juncea</i>        | Greece             | 1994 | Yasaka et al., 2017    |

|          |         |                   |           |      |                       |
|----------|---------|-------------------|-----------|------|-----------------------|
| AP017838 | GRC35   | <i>B.juncea</i>   | Greece    | 1993 | Yasaka et al., 2017   |
| AP017823 | GRC12   | <i>R.sativus</i>  | Greece    | 1993 | Yasaka et al., 2017   |
| AP017824 | GRC16   | <i>B.oleracea</i> | Greece    | 1993 | Yasaka et al., 2017   |
| AP017830 | GRC26   | <i>B.oleracea</i> | Greece    | 1993 | Yasaka et al., 2017   |
| AP017820 | GRC6    | <i>B.oleracea</i> | Greece    | 1993 | Yasaka et al., 2017   |
| AP017818 | GRC4    | <i>R.sativus</i>  | Greece    | 1993 | Yasaka et al., 2017   |
| AB989637 | AUST21  | <i>R.sativus</i>  | Australia | 2011 | Yasaka et al., 2015   |
| AP017821 | GRC10   | <i>B.juncea</i>   | Greece    | 1993 | Yasaka et al., 2017   |
| AP017827 | GRC23   | <i>B.juncea</i>   | Greece    | 1993 | Yasaka et al., 2017   |
| AP017828 | GRC24   | <i>B.juncea</i>   | Greece    | 1993 | Yasaka et al., 2017   |
| AP017816 | GRC2    | <i>B.juncea</i>   | Greece    | 1993 | Yasaka et al., 2017   |
| AP017817 | GRC3    | <i>B.juncea</i>   | Greece    | 1993 | Yasaka et al., 2017   |
| AP017822 | GRC11   | <i>R.sativus</i>  | Greece    | 1993 | Yasaka et al., 2017   |
| AP017829 | GRC25   | <i>R.sativus</i>  | Greece    | 1993 | Yasaka et al., 2017   |
| LC537477 | CHHH29A | <i>R.sativus</i>  | China     | 1999 | Kawakubo et al., 2021 |
| AB747297 | VIET138 | <i>R.sativus</i>  | Vietnam   | 2007 | Nguyen et al., 2017   |
| AB747313 | VIET178 | <i>R.sativus</i>  | Vietnam   | 2008 | Nguyen et al., 2017   |
| AB747315 | VIET180 | <i>R.sativus</i>  | Vietnam   | 2008 | Nguyen et al., 2017   |
| AB747314 | VIET179 | <i>R.sativus</i>  | Vietnam   | 2008 | Nguyen et al., 2017   |
| LC537481 | CHK55A  | <i>R.sativus</i>  | Vietnam   | 2000 | Kawakubo et al., 2021 |
| AB747298 | VIET153 | <i>R.sativus</i>  | Vietnam   | 2007 | Nguyen et al., 2017   |
| LC537578 | THA5    | <i>R.sativus</i>  | Thailand  | 2014 | Kawakubo et al., 2021 |
| LC537577 | THA3    | <i>R.sativus</i>  | Thailand  | 2014 | Kawakubo et al., 2021 |
| LC537579 | THA7    | <i>R.sativus</i>  | Thailand  | 2014 | Kawakubo et al., 2021 |
| LC537576 | THA2    | <i>R.sativus</i>  | Thailand  | 2014 | Kawakubo et al., 2021 |
| LC537575 | THA1    | <i>R.sativus</i>  | Thailand  | 2014 | Kawakubo et al., 2021 |
| LC537582 | THA13   | <i>R.sativus</i>  | Thailand  | 2014 | Kawakubo et al., 2021 |
| LC537581 | THA9    | <i>R.sativus</i>  | Thailand  | 2014 | Kawakubo et al., 2021 |
| LC537580 | THA8    | <i>R.sativus</i>  | Thailand  | 2014 | Kawakubo et al., 2021 |
| LC537512 | CHN328  | <i>R.sativus</i>  | China     | 2014 | Kawakubo et al., 2021 |
| LC537510 | CHN322  | <i>B.oleracea</i> | China     | 2014 | Kawakubo et al., 2021 |
| LC537506 | CHN301  | <i>R.sativus</i>  | China     | 2014 | Kawakubo et al., 2021 |
| KF246570 | ZH1     | <i>R.sativus</i>  | China     | 2012 | Peng et al., 2013     |
| KC119185 | BJ-B01  | <i>R.sativus</i>  | China     | 2010 | Peng et al., 2013     |
| KC119186 | BJ-B02  | <i>R.sativus</i>  | China     | 2010 | Peng et al., 2013     |
| KC119187 | BJ-B03  | <i>B.oleracea</i> | China     | 2010 | Peng et al., 2013     |
| LC537530 | CHZJ27A | <i>B.oleracea</i> | China     | 1999 | Kawakubo et al., 2021 |
| LC537534 | SAS1    | <i>B.oleracea</i> | China     | 1997 | Kawakubo et al., 2021 |
| LC537529 | CHZJ25A | <i>B.rapa</i>     | China     | 1999 | Kawakubo et al., 2021 |
| LC537479 | CHHZ3A  | <i>S.loeselii</i> | China     | 2000 | Kawakubo et al., 2021 |
| AB747287 | VIET56  | <i>S.loeselii</i> | Moc Chau  | 2007 | Nguyen et al., 2013   |
| AB747288 | VIET58  | <i>S.loeselii</i> | Moc Chau  | 2007 | Nguyen et al., 2013   |
| AB747308 | VIET173 | <i>S.loeselii</i> | Bac Giang | 2007 | Nguyen et al., 2013   |
| AB747309 | VIET174 | <i>S.loeselii</i> | Bac Giang | 2007 | Nguyen et al., 2013   |
| AB747310 | VIET175 | <i>S.loeselii</i> | Bac Giang | 2007 | Nguyen et al., 2013   |
| LC639370 | AD886J  | <i>R.sativus</i>  | Japan     | 2002 | Kawakubo et al., 2022 |
| LC639371 | AD887J  | <i>R.sativus</i>  | Japan     | 2002 | Kawakubo et al., 2022 |
| LC639372 | AD888J  | <i>R.sativus</i>  | Japan     | 2002 | Kawakubo et al., 2022 |
| LC639394 | FB999J  | <i>B.rapa</i>     | Japan     | 2004 | Kawakubo et al., 2022 |
| LC639396 | FD810J  | <i>R.sativus</i>  | Japan     | 2000 | Kawakubo et al., 2022 |
| LC639397 | FD891J  | <i>R.sativus</i>  | Japan     | 2007 | Kawakubo et al., 2022 |
| LC639471 | KD302J  | <i>R.sativus</i>  | Japan     | 2006 | Kawakubo et al., 2022 |
| LC639478 | KGB394J | <i>B.oleracea</i> | Japan     | 2007 | Kawakubo et al., 2022 |
| LC639481 | KGB964J | <i>B.rapa</i>     | Japan     | 2002 | Kawakubo et al., 2022 |
| LC639482 | KGD373J | <i>R.sativus</i>  | Japan     | 2007 | Kawakubo et al., 2022 |
| LC639483 | KGD55J  | <i>R.sativus</i>  | Japan     | 1998 | Kawakubo et al., 2022 |
| LC639498 | KGD963J | <i>R.sativus</i>  | Japan     | 2002 | Kawakubo et al., 2022 |
| LC639518 | MB649J  | <i>B.rapa</i>     | Japan     | 2007 | Kawakubo et al., 2022 |
| LC639523 | MD644J  | <i>R.sativus</i>  | Japan     | 2007 | Kawakubo et al., 2022 |

|          |         |                     |       |      |                       |
|----------|---------|---------------------|-------|------|-----------------------|
| LC639525 | MD652J  | <i>R.sativus</i>    | Japan | 2007 | Kawakubo et al., 2022 |
| LC639533 | N214    | <i>B.rapa</i>       | Japan | 1961 | Kawakubo et al., 2022 |
| LC639536 | N218    | <i>B.rapa</i>       | Japan | 1963 | Kawakubo et al., 2022 |
| LC639538 | N220    | <i>B.rapa</i>       | Japan | 1974 | Kawakubo et al., 2022 |
| LC639539 | N223    | <i>B.rapa</i>       | Japan | 1965 | Kawakubo et al., 2022 |
| LC639541 | N227    | <i>B.rapa</i>       | Japan | 1960 | Kawakubo et al., 2022 |
| LC639546 | ND260J  | <i>R.sativus</i>    | Japan | 2001 | Kawakubo et al., 2022 |
| LC639547 | ND264J  | <i>R.sativus</i>    | Japan | 2001 | Kawakubo et al., 2022 |
| LC639548 | ND271J  | <i>R.sativus</i>    | Japan | 2009 | Kawakubo et al., 2022 |
| LC639549 | ND276J  | <i>R.sativus</i>    | Japan | 2010 | Kawakubo et al., 2022 |
| LC639575 | OB284J  | <i>Brassica sp.</i> | Japan | 2007 | Kawakubo et al., 2022 |
| LC639577 | OB995J  | <i>Brassica sp.</i> | Japan | 2001 | Kawakubo et al., 2022 |
|          |         | <i>Nasturtium</i>   |       |      | Kawakubo et al., 2022 |
| LC639585 | OKB634J | <i>officinale</i>   | Japan | 2005 |                       |
| LC639601 | OKD627J | <i>R.sativus</i>    | Japan | 2002 | Kawakubo et al., 2022 |
| LC639610 | ON16J   | <i>B.napus</i>      | Japan | 1998 | Kawakubo et al., 2022 |
| LC639634 | SMD213J | <i>R.sativus</i>    | Japan | 2005 | Kawakubo et al., 2022 |
| LC639650 | TRD054J | <i>R.sativus</i>    | Japan | 2000 | Kawakubo et al., 2022 |
