# Supplementary material for: Host Plants Shape the Codon Usage Pattern of Turnip Mosaic Virus
Source: MDPI journal article supplement (doi:10.3390/v14102267), 2022-10-15
Supplement: s1 [file s1]

Table S3. The relative synonymous codon usage (RSCU) value of 59 codons of 18 amino acids of turnip mosaic virus polyprotein and the RSCU value of different hosts.

| .Codon | aa | TuMV-polyprotein       |                      |                          |                        |                      |                    |                         |                       |                          |                       |                            |                        |
|--------|----|------------------------|----------------------|--------------------------|------------------------|----------------------|--------------------|-------------------------|-----------------------|--------------------------|-----------------------|----------------------------|------------------------|
|        |    | <i>Brassica juncea</i> | Pol-B. <i>juncea</i> | <i>Brassica oleracea</i> | Pol-B. <i>oleracea</i> | <i>Brassica rapa</i> | Pol-B. <i>rapa</i> | <i>Raphanus sativus</i> | Pol-R. <i>sativus</i> | <i>Rapistrum rugosum</i> | Pol-R. <i>rugosum</i> | <i>Sisymbrium loeselii</i> | Pol-S. <i>loeselii</i> |
| TTT    | F  | <b>1.06*</b>           | 0.88                 | 0.93                     | 0.83                   | 0.93                 | 0.90               | 0.91                    | 0.85                  | <b>1.31</b>              | 0.98                  | 0.85                       | 0.93                   |
| TTC    | F  | 0.94                   | <b>1.12</b>          | <b>1.06</b>              | <b>1.17</b>            | <b>1.06</b>          | <b>1.10</b>        | <b>1.08</b>             | <b>1.16</b>           | 0.69                     | <b>1.02</b>           | <b>1.15</b>                | <b>1.07</b>            |
| TTA    | L  | 1.02                   | 0.75                 | 0.68                     | 0.71                   | 0.68                 | 0.82               | 0.64                    | 0.74                  | <b>1.86</b>              | 1.05                  | 0.61                       | 1.08                   |
| TTG    | L  | <b>1.22</b>            | <b>1.28</b>          | 1.26                     | <b>1.28</b>            | 1.26                 | <b>1.26</b>        | 1.27                    | <b>1.24</b>           | 1.09                     | <b>1.15</b>           | <b>1.26</b>                | <b>1.25</b>            |
| CTT    | L  | 1.22                   | 1.02                 | <b>1.42</b>              | 0.94                   | <b>1.43</b>          | 1.01               | <b>1.37</b>             | 1.06                  | 1.37                     | 1.12                  | 1.07                       | 1.05                   |
| CTC    | L  | 0.96                   | 1.12                 | 1.23                     | 1.19                   | 1.25                 | 1.15               | 1.28                    | 1.12                  | 0.56                     | 1.05                  | 1.08                       | 1.12                   |
| CTA    | L  | 0.83                   | 1.05                 | 0.62                     | 1.05                   | 0.62                 | 1.00               | 0.6                     | 1.03                  | 0.72                     | 0.99                  | 1.16                       | 0.88                   |
| CTG    | L  | 0.75                   | 0.78                 | 0.78                     | 0.83                   | 0.75                 | 0.77               | 0.82                    | 0.81                  | 0.4                      | 0.65                  | 0.82                       | 0.62                   |
| ATT    | I  | <b>1.19</b>            | 0.91                 | 1.05                     | 0.87                   | 1.06                 | 0.92               | 1.02                    | 0.88                  | <b>1.43</b>              | 1.00                  | 1.01                       | 1.03                   |
| ATC    | I  | 0.96                   | <b>1.05</b>          | <b>1.2</b>               | <b>1.09</b>            | <b>1.19</b>          | <b>1.06</b>        | <b>1.23</b>             | <b>1.11</b>           | 0.7                      | 0.90                  | <b>1.73</b>                | 0.90                   |
| ATA    | I  | 0.85                   | <b>1.05</b>          | 0.74                     | 1.04                   | 0.74                 | 1.02               | 0.74                    | 1.01                  | 0.87                     | <b>1.10</b>           | 0.26                       | <b>1.08</b>            |
| GTT    | V  | <b>1.23</b>            | <b>1.10</b>          | <b>1.49</b>              | 1.04                   | <b>1.48</b>          | 1.05               | <b>1.46</b>             | 1.01                  | <b>1.49</b>              | 0.99                  | <b>1.82</b>                | 1.06                   |
| GTC    | V  | 0.79                   | 0.93                 | 0.86                     | 0.96                   | 0.85                 | 0.94               | 0.88                    | 0.94                  | 0.56                     | 0.94                  | 0.59                       | 0.89                   |
| GTA    | V  | 0.97                   | 0.88                 | 0.54                     | 0.81                   | 0.53                 | 0.85               | 0.53                    | 0.87                  | 1.25                     | 0.88                  | 0.95                       | 0.88                   |
| GTG    | V  | 0.96                   | 1.09                 | 1.11                     | <b>1.19</b>            | 1.15                 | <b>1.15</b>        | 1.13                    | <b>1.18</b>           | 0.7                      | <b>1.19</b>           | 0.64                       | <b>1.16</b>            |
| TCT    | S  | <b>1.41</b>            | 0.61                 | <b>1.59</b>              | 0.58                   | <b>1.59</b>          | 0.62               | <b>1.56</b>             | 0.62                  | <b>1.61</b>              | 0.73                  | <b>1.55</b>                | 0.68                   |
| TCC    | S  | 0.98                   | 0.52                 | 0.89                     | 0.53                   | 0.88                 | 0.56               | 0.9                     | 0.56                  | 0.94                     | 0.50                  | 1.21                       | 0.51                   |
| TCA    | S  | 1.05                   | 1.37                 | 1.13                     | 1.30                   | 1.15                 | 1.37               | 1.1                     | 1.37                  | 1.12                     | <b>1.49</b>           | 0.58                       | <b>1.45</b>            |
| TCG    | S  | 0.71                   | 0.59                 | 0.66                     | 0.63                   | 0.65                 | 0.59               | 0.69                    | 0.56                  | 0.6                      | 0.50                  | 1.16                       | 0.57                   |
| AGT    | S  | 1.06                   | 1.34                 | 0.85                     | 1.37                   | 0.83                 | 1.32               | 0.85                    | 1.38                  | 1.23                     | 1.40                  | 0.62                       | 1.41                   |
| AGC    | S  | 0.79                   | <b>1.57</b>          | 0.89                     | <b>1.59</b>            | 0.89                 | <b>1.54</b>        | 0.91                    | <b>1.51</b>           | 0.5                      | 1.38                  | 0.88                       | 1.39                   |
| CCT    | P  | <b>1.33</b>            | 0.60                 | <b>1.5</b>               | 0.60                   | <b>1.53</b>          | 0.61               | <b>1.53</b>             | 0.63                  | <b>1.45</b>              | 0.53                  | <b>2.02</b>                | 0.55                   |
| CCC    | P  | 0.8                    | 0.38                 | 0.56                     | 0.36                   | 0.54                 | 0.44               | 0.53                    | 0.43                  | 0.62                     | 0.51                  | 0.84                       | 0.50                   |
| CCA    | P  | 1.16                   | <b>2.47</b>          | 1.19                     | <b>2.54</b>            | 1.18                 | <b>2.36</b>        | 1.18                    | <b>2.37</b>           | 1.19                     | <b>2.37</b>           | 0.8                        | <b>2.30</b>            |
| CCG    | P  | 0.72                   | 0.55                 | 0.73                     | 0.50                   | 0.73                 | 0.59               | 0.75                    | 0.58                  | 0.6                      | 0.59                  | 0.34                       | 0.65                   |
| ACT    | T  | <b>1.34</b>            | 0.84                 | <b>1.23</b>              | 0.82                   | <b>1.25</b>          | 0.80               | <b>1.27</b>             | 0.81                  | <b>1.52</b>              | 0.81                  | <b>1.94</b>                | 0.81                   |
| ACC    | T  | 0.95                   | 0.72                 | 0.9                      | 0.73                   | 0.87                 | 0.75               | 0.89                    | 0.77                  | 0.86                     | 0.75                  | 1.12                       | 0.72                   |
| ACA    | T  | 0.98                   | <b>1.66</b>          | 1.14                     | <b>1.68</b>            | 1.13                 | <b>1.72</b>        | 1.08                    | <b>1.63</b>           | 1.09                     | <b>1.75</b>           | 0.53                       | <b>1.77</b>            |
| ACG    | T  | 0.73                   | 0.78                 | 0.73                     | 0.76                   | 0.74                 | 0.73               | 0.76                    | 0.80                  | 0.54                     | 0.69                  | 0.41                       | 0.70                   |
| GCT    | A  | <b>1.5</b>             | 0.87                 | <b>1.67</b>              | 0.84                   | <b>1.68</b>          | 0.88               | <b>1.65</b>             | 0.82                  | <b>1.81</b>              | 0.93                  | <b>1.26</b>                | 0.90                   |
| GCC    | A  | 0.97                   | 0.58                 | 0.7                      | 0.64                   | 0.69                 | 0.62               | 0.72                    | 0.64                  | 0.69                     | 0.56                  | 0.95                       | 0.59                   |
| GCA    | A  | 0.96                   | <b>1.90</b>          | 0.99                     | <b>1.86</b>            | 0.99                 | <b>1.88</b>        | 0.98                    | <b>1.89</b>           | 1.06                     | <b>1.99</b>           | 1.07                       | <b>1.94</b>            |
| GCG    | A  | 0.51                   | 0.65                 | 0.64                     | 0.66                   | 0.64                 | 0.63               | 0.65                    | 0.65                  | 0.44                     | 0.52                  | 0.71                       | 0.58                   |
| TAT    | Y  | <b>1.23</b>            | 0.88                 | 0.9                      | 0.84                   | 0.9                  | 0.93               | 0.87                    | 0.89                  | <b>1.48</b>              | 0.96                  | <b>1.03</b>                | 0.89                   |
| TAC    | Y  | 0.73                   | <b>1.12</b>          | <b>1.07</b>              | <b>1.16</b>            | <b>1.07</b>          | <b>1.07</b>        | <b>1.1</b>              | <b>1.11</b>           | 0.47                     | <b>1.04</b>           | 0.97                       | <b>1.11</b>            |
| CAT    | H  | <b>1.22</b>            | 0.86                 | <b>1.09</b>              | 0.85                   | <b>1.08</b>          | 0.87               | <b>1.05</b>             | 0.88                  | <b>1.28</b>              | 0.89                  | 0.84                       | 0.93                   |

|     |   |             |             |             |             |             |             |             |             |             |             |             |             |
|-----|---|-------------|-------------|-------------|-------------|-------------|-------------|-------------|-------------|-------------|-------------|-------------|-------------|
| CAC | H | 0.66        | <b>1.14</b> | 0.86        | <b>1.15</b> | 0.87        | <b>1.13</b> | 0.91        | <b>1.12</b> | 0.63        | <b>1.11</b> | <b>1.17</b> | <b>1.07</b> |
| CAA | Q | <b>1.21</b> | 0.91        | <b>1.03</b> | 0.87        | <b>1.02</b> | <b>1.01</b> | 0.98        | 0.98        | <b>1.49</b> | <b>1.22</b> | <b>1.04</b> | <b>1.22</b> |
| CAG | Q | 0.74        | <b>1.09</b> | 0.96        | <b>1.13</b> | 0.97        | 0.99        | <b>1.01</b> | <b>1.02</b> | 0.5         | 0.78        | 0.96        | 0.78        |
| AAT | N | <b>1.22</b> | 0.78        | 0.86        | 0.75        | 0.84        | 0.82        | 0.83        | 0.81        | <b>1.32</b> | 0.95        | 0.58        | 0.97        |
| AAC | N | 0.75        | <b>1.22</b> | <b>1.13</b> | <b>1.25</b> | <b>1.15</b> | <b>1.18</b> | <b>1.16</b> | <b>1.19</b> | 0.65        | <b>1.05</b> | <b>1.42</b> | <b>1.03</b> |
| AAA | K | <b>1.13</b> | 0.89        | 0.89        | 0.87        | 0.87        | 0.91        | 0.89        | 0.91        | <b>1.41</b> | <b>1.00</b> | <b>1.11</b> | 0.97        |
| AAG | K | 0.87        | <b>1.11</b> | <b>1.11</b> | <b>1.13</b> | <b>1.12</b> | <b>1.09</b> | <b>1.1</b>  | <b>1.09</b> | 0.56        | <b>1.00</b> | 0.89        | <b>1.03</b> |
| GAT | D | <b>1.31</b> | <b>1.09</b> | <b>1.23</b> | <b>1.04</b> | <b>1.23</b> | <b>1.07</b> | <b>1.22</b> | <b>1.04</b> | <b>1.45</b> | <b>1.14</b> | <b>1.39</b> | <b>1.11</b> |
| GAC | D | 0.69        | 0.91        | 0.76        | 0.96        | 0.77        | 0.93        | 0.78        | 0.96        | 0.55        | 0.86        | 0.61        | 0.89        |
| GAA | E | <b>1.13</b> | 0.94        | 0.93        | 0.95        | 0.92        | <b>1.05</b> | 0.92        | 0.96        | <b>1.45</b> | <b>1.25</b> | <b>1.17</b> | <b>1.22</b> |
| GAG | E | 0.83        | <b>1.06</b> | <b>1.07</b> | <b>1.05</b> | <b>1.08</b> | 0.95        | <b>1.08</b> | <b>1.04</b> | 0.55        | 0.75        | 0.83        | 0.78        |
| TGT | C | <b>1</b>    | <b>1.13</b> | <b>1.02</b> | <b>1.16</b> | <b>1.03</b> | <b>1.15</b> | <b>1.01</b> | <b>1.12</b> | <b>1.27</b> | <b>1.10</b> | <b>1.18</b> | <b>1.06</b> |
| TGC | C | 0.89        | 0.87        | 0.9         | 0.84        | 0.89        | 0.85        | 0.89        | 0.88        | 0.54        | 0.90        | 0.82        | 0.94        |
| CGT | R | 0.9         | 0.61        | 0.95        | 0.64        | 0.97        | 0.61        | 0.93        | 0.67        | 1.49        | 0.72        | <b>1.61</b> | 0.67        |
| CGC | R | 0.61        | 0.76        | 0.53        | 0.74        | 0.51        | 0.78        | 0.52        | 0.78        | 0.53        | 0.70        | 0.64        | 0.67        |
| CGA | R | 1.02        | 1.09        | 0.61        | 1.05        | 0.59        | 1.09        | 0.57        | 1.08        | 1.31        | 1.11        | 1.39        | 1.14        |
| CGG | R | 0.73        | 0.46        | 0.51        | 0.46        | 0.5         | 0.41        | 0.49        | 0.43        | 0.48        | 0.34        | 0.24        | 0.29        |
| AGA | R | <b>1.6</b>  | <b>1.92</b> | <b>2.01</b> | <b>2.03</b> | <b>2.04</b> | <b>1.94</b> | <b>2.07</b> | <b>1.88</b> | <b>1.54</b> | <b>2.02</b> | 1.12        | <b>2.06</b> |
| AGG | R | 1.14        | 1.16        | 1.38        | 1.09        | 1.38        | 1.16        | 1.41        | 1.16        | 0.66        | 1.11        | 1           | 1.18        |
| GGT | G | 1.17        | 1.06        | 1.23        | 1.02        | 1.25        | 1.05        | 1.25        | 1.01        | 1.28        | 1.09        | 1.25        | 1.04        |
| GGC | G | 0.64        | 0.77        | 0.65        | 0.79        | 0.64        | 0.81        | 0.64        | 0.88        | 0.42        | 0.80        | 0.32        | 0.85        |
| GGA | G | <b>1.29</b> | <b>1.56</b> | <b>1.39</b> | <b>1.63</b> | <b>1.4</b>  | <b>1.56</b> | <b>1.38</b> | <b>1.51</b> | <b>1.55</b> | <b>1.57</b> | <b>1.53</b> | <b>1.59</b> |
| GGG | G | 0.85        | 0.61        | 0.72        | 0.56        | 0.71        | 0.57        | 0.73        | 0.60        | 0.74        | 0.54        | 0.9         | 0.52        |

\* The most frequently used codons are shown in bold
